# Supplementary material
Source: Springer Nature journal article supplement (https://www.springermedizin.de/resource/supplementary/13018_2010_277_MOESM1_ESM.pdf/9636684)

**a**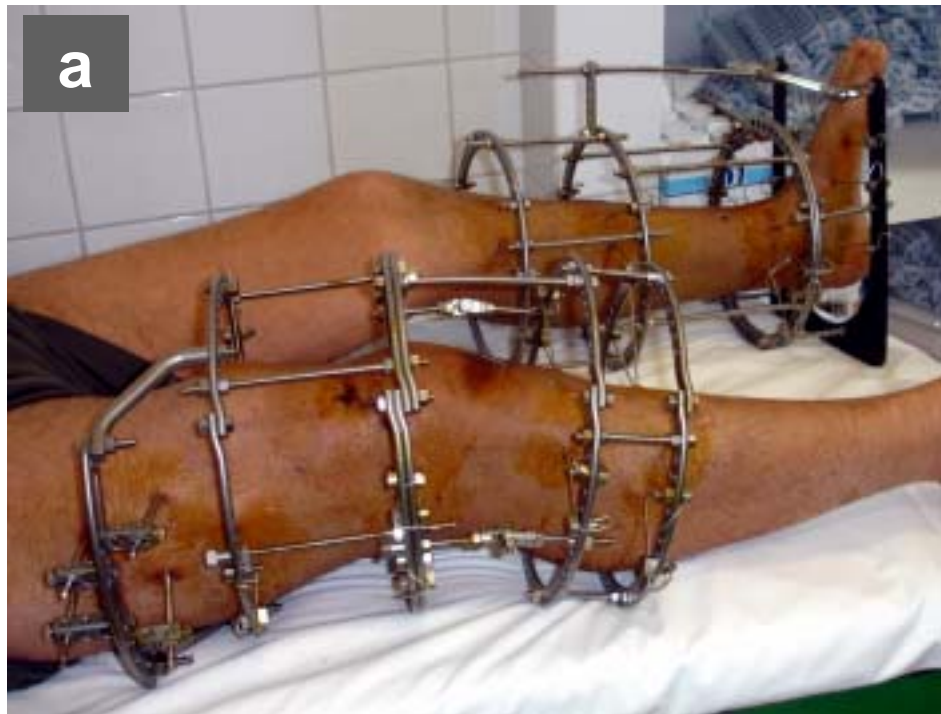**c**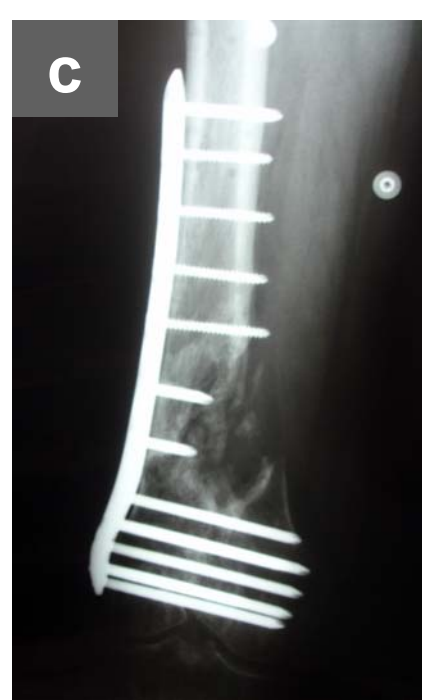**b**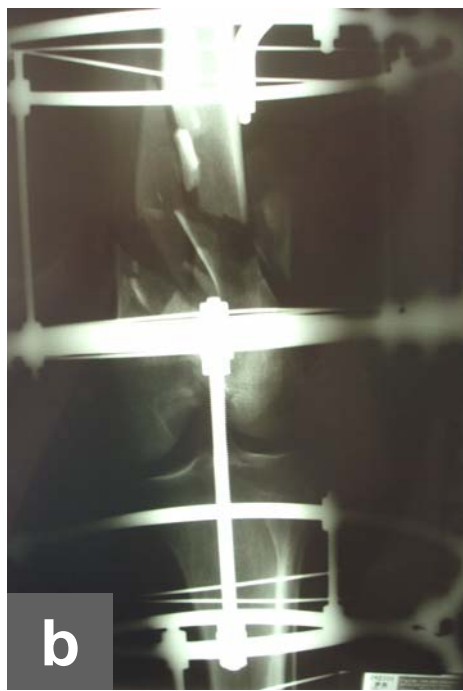**d**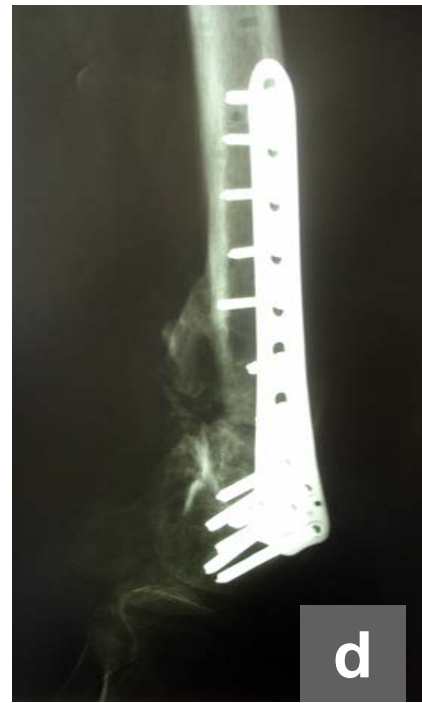

Supplement: MOESM1 [file 9636684]
